# Supplementary material
Source: ML conference proceedings conference paper supplement (https://www.ecva.net/papers/eccv_2022/papers_ECCV/html/136980104_ECCV_2022_paper.php)
Supplement: Supplementary file 2 [file 136980104-supp.zip]

Archive with 1 entries (1 files):
- supple/supplementary_material_0.pdf
